# Supplementary material for: Usability of the Test of Adherence to Inhalers Toolkit to patients with COPD in Kyrgyzstan
Source: Research Square preprint supplement (doi:10.21203/rs.3.rs-7498911/v1), 2025-09-11

**Appendix 1. Patient questionnaire**

PHC №_____ Name of GP ____________________________ Phone: ___________________

Diagnosis:____________________________________________________________________

| *Demographics* | | | | | | | | |
| --- | --- | --- | --- | --- | --- | --- | --- | --- |
| Patient ID | _________ | | | | | | | |
| How old are you? | | | ............ years Date of birth «_____» __________________ 19____ y. | | | | | |
| Gender | Male/female | | | | | | | |
| Height | ............ см Weight ............ kg | | | | | | | |
| SpO2 | ______% Pulse ______ BP ____________ Hg mm | | | | | | | |
| What is your education? | | | | | ☐ No  ☐ Primary school  ☐ Secondary school  ☐ College/technical school  ☐ Higher | | | |
| Do you work? | | ☐ Yes ☐ No | | | | | | |
| What kind of job? | | | _______________________________________________________ | | | | | |
| *Risk factors* | | | | | | | | |
| Smoking status: | | □ Smoker □ ex-smoker □ never smoked | | | | | | |
| What types of tobacco products: | | | | □ Cigarettes □ Nasvay □ Hookah □ E-cigarettes □ Snus □ Aicos | | | | |
| Do you use biomass (kizyak) for cooking and/or heating? | | | | | | | | □ Yes ☐ No |
| *Clinical variables* | | | | | | | | |
| FVC ____ % FEV1 % (ml) ____ % ____ ml FEV1/FVC____ САТ ____ mMRC ____ | | | | | | | | |
| **Comorbidities** | | | | | | |  | |
| - Cardiovascular diseases | | | | | | □ Yes ☐ No | | |
| - Cerebral stroke | | | | | | □ Yes ☐ No | | |
| - *If yes, what year ____, where verified _____________________________________* | | | | | | | | |
| - Allergic rhinitis | | | | | | □ Yes ☐ No | | |
| - Bronchiectatic disease | | | | | | □ Yes ☐ No | | |
| - Diabetes mellitus | | | | | | □ Yes ☐ No | | |
| - Depression/anxiety | | | | | | □ Yes ☐ No | | |
| - TB | | | | | | □ Yes ☐ No | | |
| - Other (specify) | | | | | | □ Yes ☐ No | | |

**Patient questions:**

1. How satisfied are you with the advice given by your doctor about your disease from 1 to 10? _______
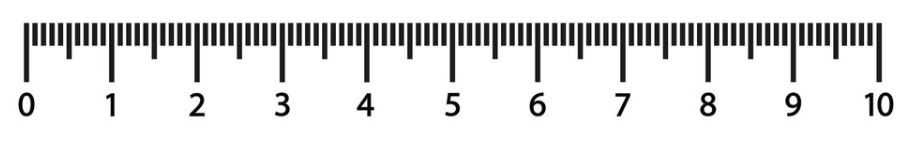


2. Would this advice on adherence be helpful to patients with the same diagnosis as yours?

 Yes  No

**Appendix 2. Questions for the healthcare worker**

**SUS (System Usability Scale) questionnaire**

PHC№ ___ Name: ________________________ Phone: ______________ Date ________________

*Instructions:* For each of the following statements, tick the one box that best suits you.

| **№** |  | **Strongly disagree**  **0** | **1** | **2** | **3** | **Strongly agree**  **4** |
| --- | --- | --- | --- | --- | --- | --- |
| 1. | I will be using this tool (TAI Toolkit) often |  |  |  |  |  |
| 2. | The tool is too complicated |  |  |  |  |  |
| 3. | The tool is easy to use |  |  |  |  |  |
| 4. | I will need help to learn how to use this tool |  |  |  |  |  |
| 5. | The different functions in this tool are grouped together correctly |  |  |  |  |  |
| 6. | There are too many inconsistencies in the tool |  |  |  |  |  |
| 7. | Most people will learn to use this tool very quickly |  |  |  |  |  |
| 8. | This tool is very difficult to use |  |  |  |  |  |
| 9. | I felt confident using this tool |  |  |  |  |  |
| 10. | I had to learn a lot before I could use the tool |  |  |  |  |  |

**Questions for the health care provider:**

1. How old are you? _________ 2. Gender: □ male □ female

3. How many asthma/COPD patients do you see per week? ___________

4. Are you satisfied with this TAI Toolkit instrument?  Yes  No

5. Please, rate this TAI Toolkit on a 10-point scale _________________

6. Rate from 1 to 3 (1-sometimes, 2-sometimes, 3-frequently). Which of the following tips from the TAI Toolkit have you recommended most to patients with COPD/asthma?

□ Reminders □ Reminders and/or counseling □ Education and/or counseling □ Medication plan □ Inhalation instruction

7. Please give us your tips and suggestions on how to improve the TAI Toolkit to make it easier for you to use __________________________________________________________________

8. Please, rate TAI Toolkit from 1 to 10 ________


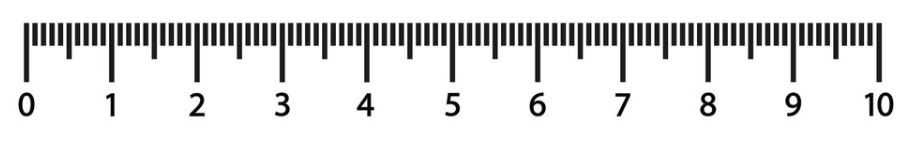


Excellent

Bad

**Appendix 3. Informed consent**

Patient: ______________________________________________________________________

Date: ________________________________________________________________________

Consent to participate in this study called the Inhalation Adherence Test for patients with COPD in Kyrgyzstan.

The purpose of this activity is to obtain information about your disease and your adherence to taking inhaled medication to treat your disease, and to recommend to your doctors the necessary advice to improve treatment adherence.

We will use the information from this study to write a report. This report will be a public document. Your answers will be anonymous, which means your names will not be used in any way in the report.

Your participation in this study is voluntary. You have the right to withdraw at any point in the study, for any reason. If you withdraw from the study, the information obtained from you, the records and reports you provide will not be used

Please feel free to ask any questions about the study at any time. If you have questions later, you may contact our study leader: Tabyshova A.K., email: aijamaltabyshova@gmail.com. Your suggestions and concerns are very important to us.

I confirm that I have been given information about participating in this study and that I understand it.

 YES / NO (please circle one of the two options)

Lastly, we would like to ask your permission to take a photograph of you during or after our work together. If you agree to this, please circle yes. If you do not wish to be photographed, please circle "no"

 YES / NO (please circle one of the two options)

Your name ____________________________________________________________________

Your signature _________________________________________ Date ___________________

**For the researcher:**

I declare that I have informed the participant about participation in this study.

Researcher's name: ______________________________________________________________

Researcher's signature _______________________________________ Date______________

**Appendix 4.** STROBE Statement—Checklist of items that should be included in reports of ***cross-sectional studies***

|  | Item No | Recommendation |
| --- | --- | --- |
| **Title and abstract** | 1 | (*a*) Indicate the study’s design with a commonly used term in the title or the abstract |
| (*b*) Provide in the abstract an informative and balanced summary of what was done and what was found |
| Introduction | | |
| Background/rationale | 2 | Explain the scientific background and rationale for the investigation being reported |
| Objectives | 3 | State specific objectives, including any prespecified hypotheses |
| Methods | | |
| Study design | 4 | Present key elements of study design early in the paper |
| Setting | 5 | Describe the setting, locations, and relevant dates, including periods of recruitment, exposure, follow-up, and data collection |
| Participants | 6 | (*a*) Give the eligibility criteria, and the sources and methods of selection of participants |
| Variables | 7 | Clearly define all outcomes, exposures, predictors, potential confounders, and effect modifiers. Give diagnostic criteria, if applicable |
| Data sources/ measurement | 8* | For each variable of interest, give sources of data and details of methods of assessment (measurement). Describe comparability of assessment methods if there is more than one group |
| Bias | 9 | Describe any efforts to address potential sources of bias |
| Study size | 10 | Explain how the study size was arrived at |
| Quantitative variables | 11 | Explain how quantitative variables were handled in the analyses. If applicable, describe which groupings were chosen and why |
| Statistical methods | 12 | (*a*) Describe all statistical methods, including those used to control for confounding |
| (*b*) Describe any methods used to examine subgroups and interactions |
| (*c*) Explain how missing data were addressed |
| (*d*) If applicable, describe analytical methods taking account of sampling strategy |
| (*e*) Describe any sensitivity analyses |
| Results | | |
| Participants | 13* | (a) Report numbers of individuals at each stage of study—e.g. numbers potentially eligible, examined for eligibility, confirmed eligible, included in the study, completing follow-up, and analysed |
| (b) Give reasons for non-participation at each stage |
| (c) Consider use of a flow diagram |
| Descriptive data | 14* | (a) Give characteristics of study participants (e.g. demographic, clinical, social) and information on exposures and potential confounders |
| (b) Indicate number of participants with missing data for each variable of interest |
| Outcome data | 15* | Report numbers of outcome events or summary measures |
| Main results | 16 | (*a*) Give unadjusted estimates and, if applicable, confounder-adjusted estimates and their precision (e.g., 95% confidence interval). Make clear which confounders were adjusted for and why they were included |
| (*b*) Report category boundaries when continuous variables were categorized |
| (*c*) If relevant, consider translating estimates of relative risk into absolute risk for a meaningful time period |
| Other analyses | 17 | Report other analyses done—e.g. analyses of subgroups and interactions, and sensitivity analyses |
| Discussion | | |
| Key results | 18 | Summarise key results with reference to study objectives |
| Limitations | 19 | Discuss limitations of the study, taking into account sources of potential bias or imprecision. Discuss both direction and magnitude of any potential bias |
| Interpretation | 20 | Give a cautious overall interpretation of results considering objectives, limitations, multiplicity of analyses, results from similar studies, and other relevant evidence |
| Generalisability | 21 | Discuss the generalisability (external validity) of the study results |
| Other information | | |
| Funding | 22 | Give the source of funding and the role of the funders for the present study and, if applicable, for the original study on which the present article is based |

*Give information separately for exposed and unexposed groups.

**Note:** An Explanation and Elaboration article discusses each checklist item and gives methodological background and published examples of transparent reporting. The STROBE checklist is best used in conjunction with this article (freely available on the Web sites of PLoS Medicine at http://www.plosmedicine.org/, Annals of Internal Medicine at http://www.annals.org/, and Epidemiology at http://www.epidem.com/). Information on the STROBE Initiative is available at www.strobe-statement.org.

**Appendix 5.** The TAI Toolkit in local language


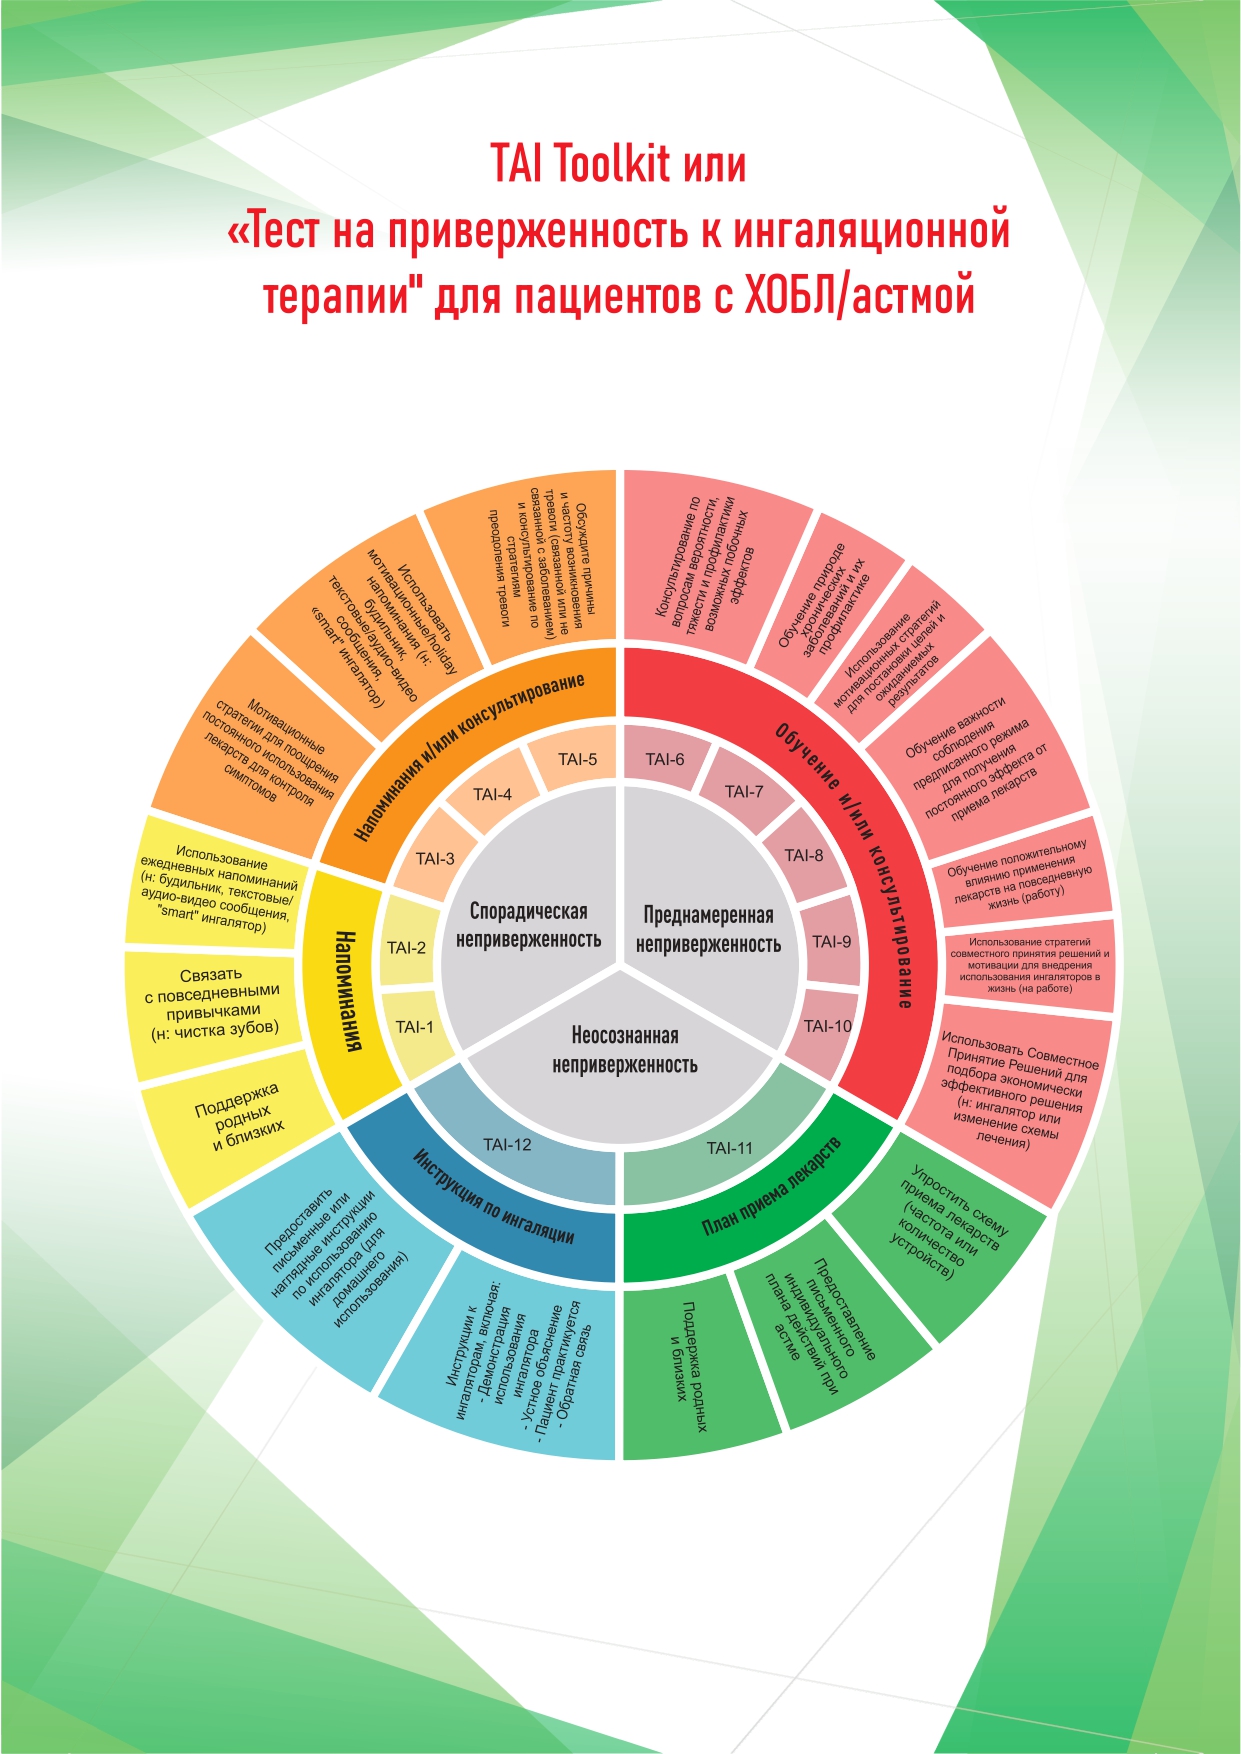


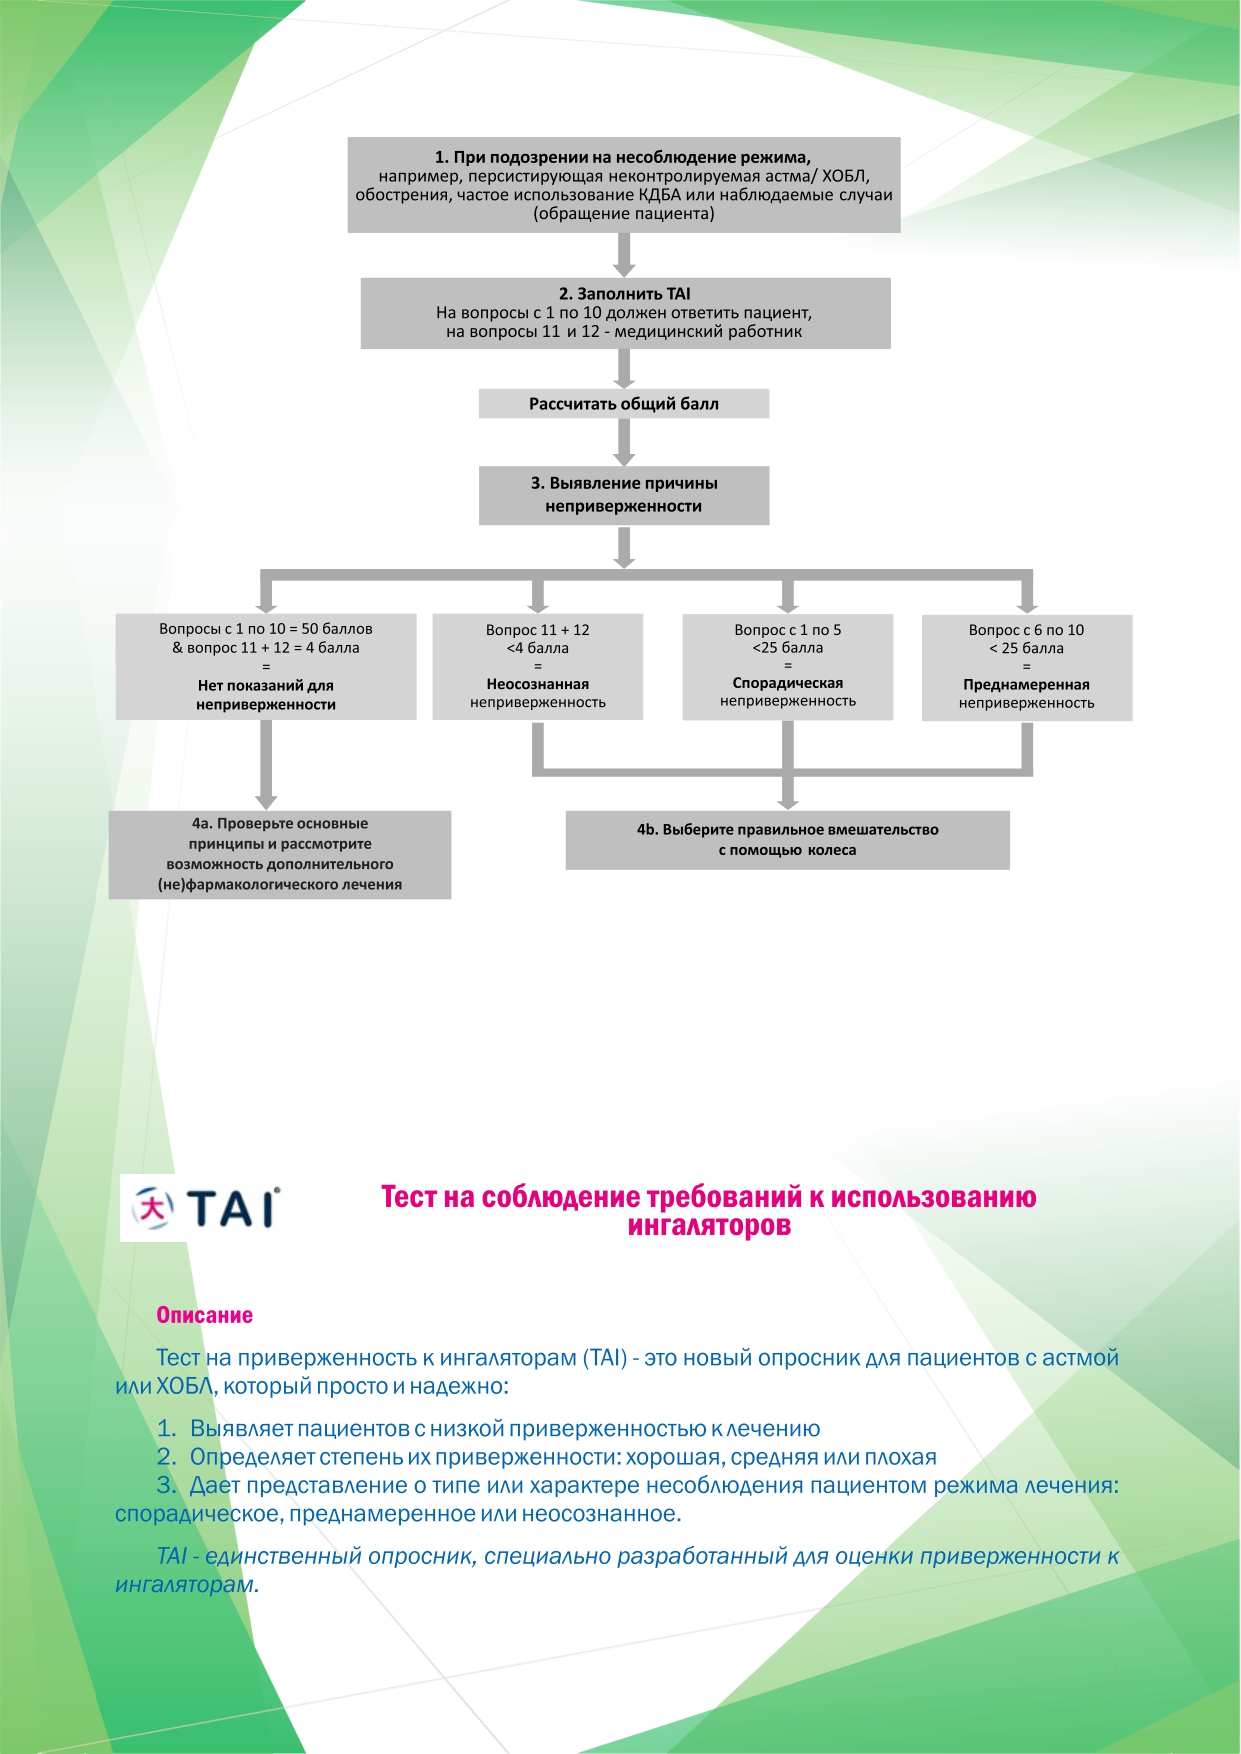


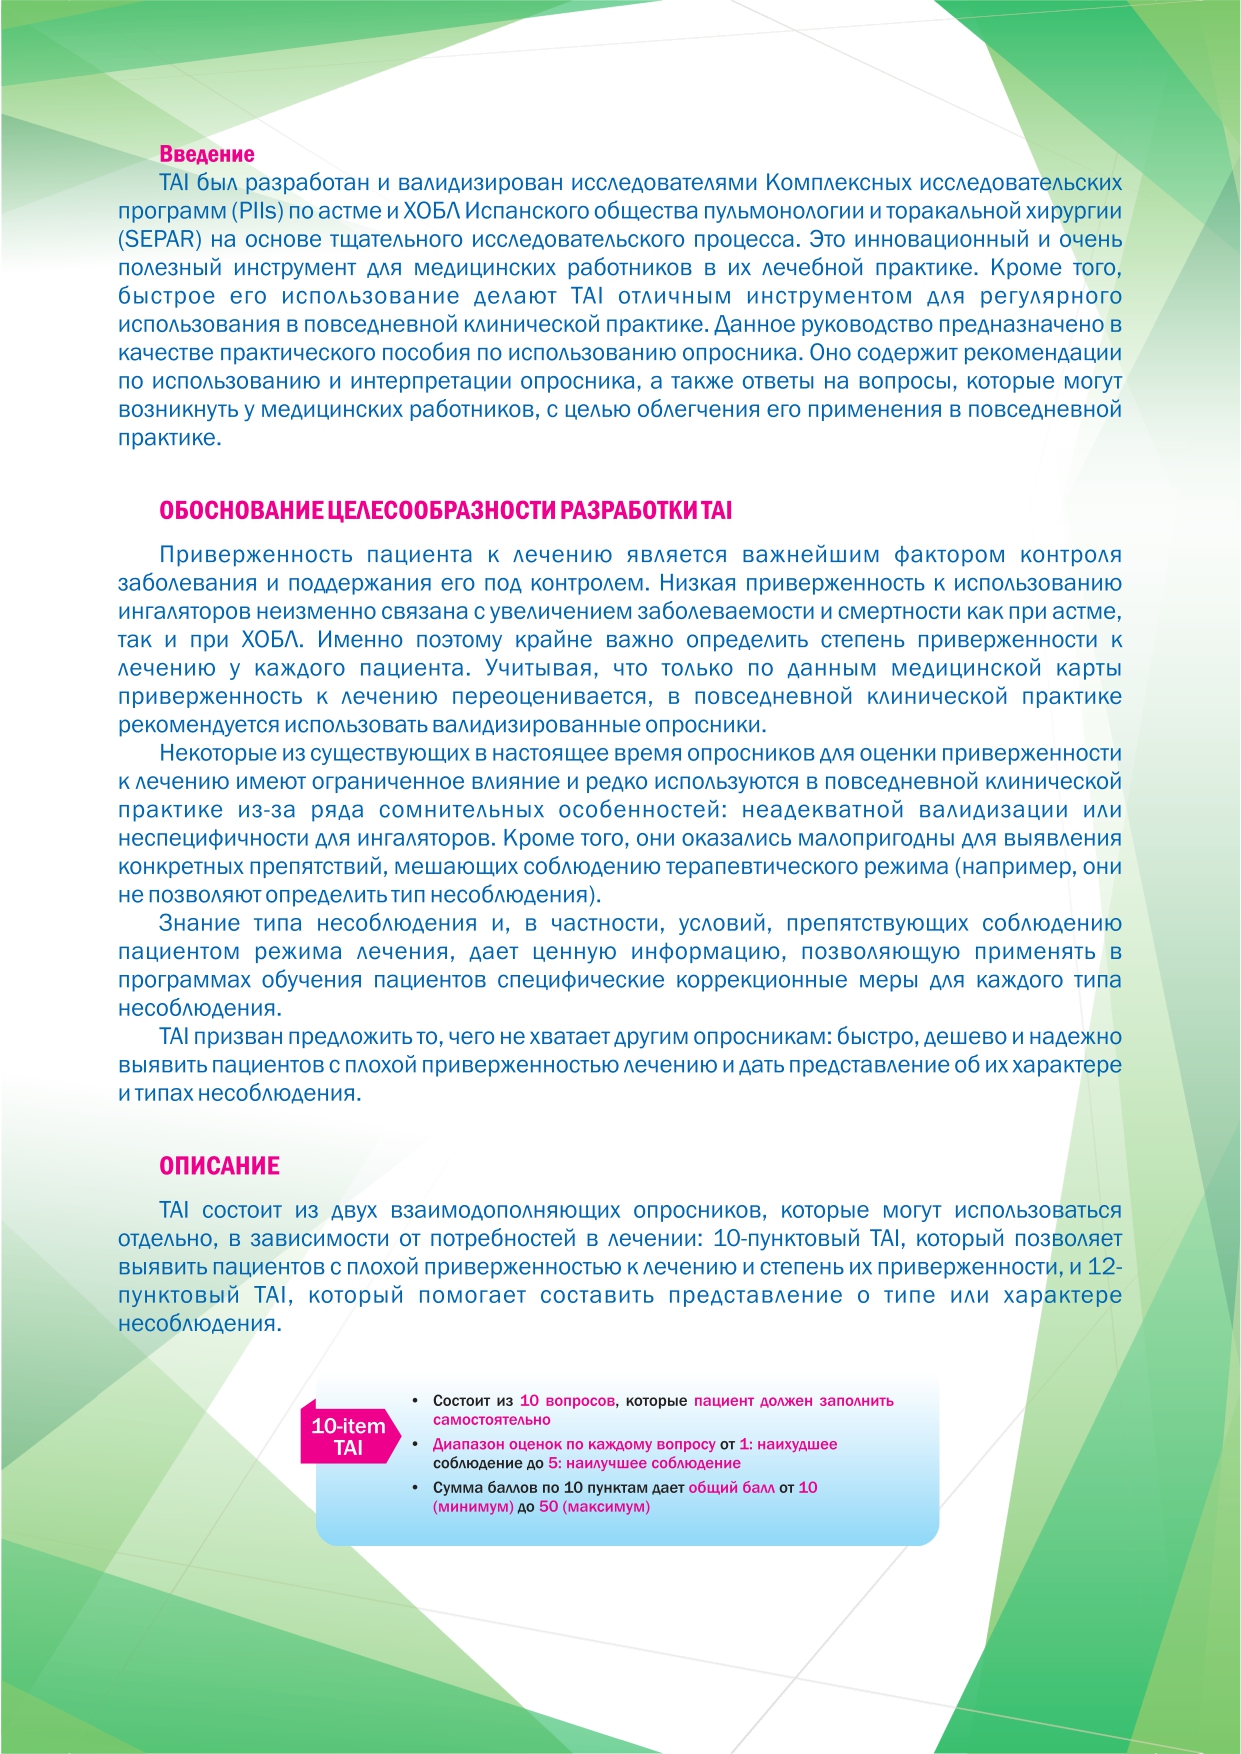


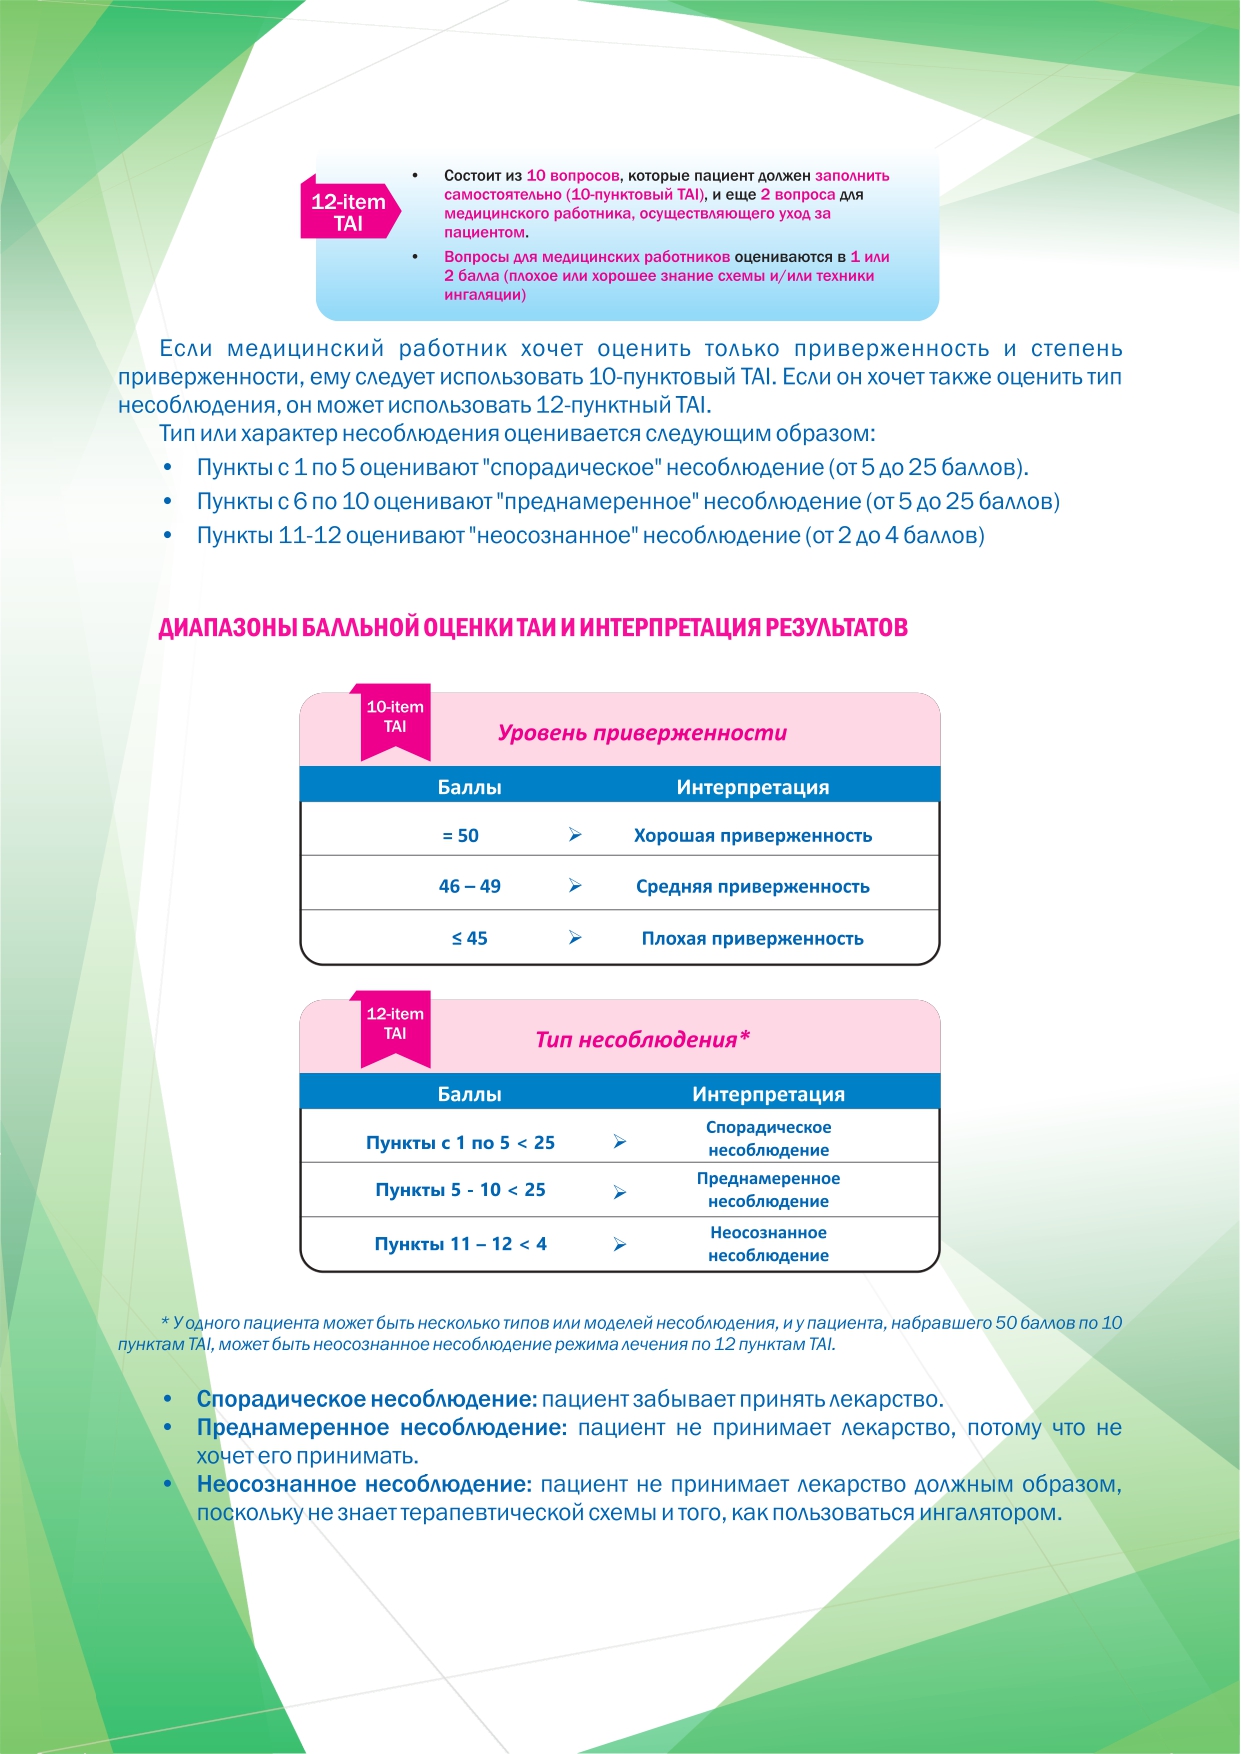

Supplement: Supplementary file 1 [file 711bb8af76b23dae5b26b609.docx]
